# Supplementary material
Source: MDPI journal article supplement (https://www.mdpi.com/2311-5637/9/7/641)
Supplement: s1 [file s1]

## Supplementary material

**Table S1.** Technical data related to different equipment used for lactic acid production.

| Discrete modeling steps/ Equip-<br>ment   | Equipment param-<br>eter | Units                     | Base Size | Base value (\$) | Base<br>year | Exp* |
|-------------------------------------------|--------------------------|---------------------------|-----------|-----------------|--------------|------|
| Belt conveyor <sup>1</sup>                | Length                   | m                         | 30.48     |                 |              |      |
|                                           | Width                    | cm                        | 60.96     | 70,000          | 2009         | 0.8  |
|                                           | Power                    | W/kg/s                    | 720       |                 |              |      |
| Grinder <sup>1</sup>                      | Throughput               | t/h                       | 28        | 302,000         | 2000         | 0.6  |
|                                           | Diameter                 | cm                        | 35.56     |                 |              |      |
| Screw conveyor <sup>2</sup>               | Length                   | m                         | 30.48     | 20,000          | 2009         | 0.8  |
|                                           | Specific power           | W/((m <sup>3</sup> /s)*m) | 10,800    |                 |              |      |
| Bucket elevator <sup>2</sup>              | Throughput               | t/hr.                     |           |                 |              |      |
|                                           | Volume                   | m <sup>3</sup>            | 20000     | 3,500,000       | 2009         | 0.6  |
| Storage <sup>2</sup>                      | Diameter                 | cm                        | 35        |                 |              |      |
|                                           | Length                   | m                         | 30.48     | 20,000          | 2009         | 0.8  |
|                                           | Specific power           | W/((m <sup>3</sup> /s)*m) | 10,800    |                 |              |      |
| Heat exchanger <sup>2</sup>               | Area                     | m <sup>2</sup>            | 120       | 118000          | 2018         |      |
| Acid storage tank <sup>2</sup>            | Volume                   | m <sup>3</sup>            | 48        | 6210            | 2010         | 0.7  |
| Pump <sup>2</sup>                         |                          |                           |           |                 |              |      |
| Acid hydrolysis reactor <sup>2</sup>      | Volume                   | m <sup>3</sup>            | 36.70     | 19,812,400      | 2009         | 0.6  |
| Flash cooling tank <sup>2</sup>           | Volume                   | m <sup>3</sup>            | 416.4     | 511,000         | 2009         | 0.7  |
| Neutralization tank <sup>2</sup>          | Volume                   | m <sup>3</sup>            | 446.7     | 236,000         | 2009         | 0.7  |
| Cooling unit <sup>2</sup>                 | Area                     | m <sup>2</sup>            | 14.3      | 38,000          |              |      |
| Enzymatic hydrolysis reactor <sup>2</sup> | Volume                   | m <sup>3</sup>            | 3256      | 837,000         | 2015         | 0.6  |
| Seed fermenter <sup>2</sup>               | Volume                   | m <sup>3</sup>            | 900       | 300,000         | 2008         | 0.5  |
| Fermentation tank <sup>2</sup>            | Volume                   | m <sup>3</sup>            | 3256      | 837,000         | 2015         | 0.6  |
| Storage tank <sup>2</sup>                 | Volume                   | m <sup>3</sup>            | 2325      | 165,800         | 1997         | 0.5  |
| Dryer <sup>3</sup>                        | Area                     | m <sup>2</sup>            | 80.12     | 8,349           | 2002         | 0.6  |
| Rotary vacuum filter <sup>4</sup>         | Filter area              | m <sup>2</sup>            | 101       | 254,000         |              |      |
| Neutralization tank <sup>2</sup>          | Volume                   | m <sup>3</sup>            | 446.7     | 236,000         | 2009         | 0.7  |
| Gypsum removal filter                     | Filter area              | m <sup>2</sup>            | 65        | 195,000         |              |      |
| Evaporator                                | Area                     | m <sup>2</sup>            | 315       | 2068000         |              |      |
| Distillation column <sup>4</sup>          | Volume                   | m <sup>3</sup>            | 212       | 879,000         |              |      |
| Distillation column <sup>4</sup>          | Volume                   | m <sup>3</sup>            | 119       | 420,000         |              |      |
| Lignin removal <sup>4</sup>               | Area                     | m <sup>2</sup>            | 342       | 525,000         |              |      |
| Anerobic digester <sup>4</sup>            | Volume                   | m <sup>3</sup>            | 22463     | 2,989,000       | 2015         |      |
| Steam generator <sup>4</sup>              | Throughput               | t/hr.                     | 65        | 696,000         | 2018         |      |
| Steam turbine <sup>4</sup>                | Power                    | kW                        | 6705      | 1444000         | 2018         |      |

Note: \* Exponent for size factor

<sup>[1]</sup> Wright et. al., 2010

<sup>[2]</sup> Humbird et. al., 2011

<sup>[3]</sup> Jones et al., 2013

<sup>[4]</sup> Superpro Designer®

## References

1. Wright MM, Satrio J, Brown RC, Daugaard DE, et al. Techno-economic analysis of biomass fast pyrolysis to transportation fuels. Technical Report NREL/TP-6A20-46586 (2010).
2. Humbird D, Davis R, Tao L, et al. Process Design and Economics for Biochemical Conversion of Lignocellulosic Biomass to Ethanol. Technical Report NREL/LTP-5100-47764 (2011).
3. Jones S, Meyer P, Snowden-Swan L, et al. Process design and economics for the conversion of lignocellulosic biomass to hydrocarbon fuels: Fast pyrolysis and hydrotreating bio-oil pathway. Technical Report PNNL-23053 \NREL/TP-5100-61178 (2013).
4. Intelligen Inc. SuperPro Designer Software Version 10. (2023).

,
